# Supplementary material for: Predicting Postoperative Lung Function Following Lung Cancer Resection: A Systematic Review and Meta-analysis
Source: PubMed Central journal article supplement — eClinicalMedicine. 2019 Sep 10;15:7–13. doi: 10.1016/j.eclinm.2019.08.015 (PMC6833443; doi:10.1016/j.eclinm.2019.08.015), 2019-09-10
Supplement: mmc1.pdf [file mmc1.pdf]

## Supplementary materials

### Appendix 1. Search terms entered into Pubmed

1. Lung cancer surgery
2. Lung surgery
3. Pulmonary surgery
4. Lung resection
5. Pulmonary resection
6. Sublobar resection
7. Anatomical resection
8. Pneumonectomy
9. Lobectomy
10. Wedge
11. Segmentectomy
12. Thoracic surgery
  
13. Predict\*
14. Correlat\*
15. Quanti\*
  
16. Postoperati\*
17. Post operati\*
18. Post surg\*
19. After surgery
20. After pneumonectomy
21. After lobectomy
22. After thoracotomy
23. After VATS
  
24. Respiratory function test
25. Respiratory function
26. Pulmonary function test
27. Pulmonary function
28. Lung function test
29. Lung function
30. Gas transfer
31. Diffus\* capacity
32. Spiromet\*
  
33. All surgical terms 1 or 2 or 3 or 4 or 5 or 6 or 7 or 8 or 9 or 10 or 11 or 12
34. All prediction terms 13 or 14 or 15
35. All postoperative terms 16 or 17 or 18 or 19 or 20 or 21 or 22 or 23
36. All lung function terms 24 or 25 or 26 or 27 or 28 or 29 or 30 or 31 or 32
- 37. 32 and 33 and 34 and 35**

## Appendix 2 Risk of bias assessments for eligible full papers

| Author Code | Paper                                         | Risk of bias          |            |         |                      |          | Applicability         |            |         |
|-------------|-----------------------------------------------|-----------------------|------------|---------|----------------------|----------|-----------------------|------------|---------|
|             |                                               | Participant selection | Predictors | Outcome | Sample size and flow | Analysis | Participant selection | Predictors | Outcome |
| 2042        | Hara et al, 2017 <sup>1</sup>                 | unclear               | low        | low     | unclear              | unclear  | unclear               | low        | low     |
| 2011        | Fourdrain et al, 2017 <sup>2</sup>            | low                   | low        | low     | low                  | low      | low                   | low        | low     |
| 2021        | Suh et al, 2017 <sup>3</sup>                  | low                   | low        | unclear | high                 | high     | high                  | low        | low     |
| 2031        | Usuda et al, 2017 <sup>4</sup>                | high                  | low        | low     | unclear              | high     | low                   | low        | low     |
| 115         | Yoo et al, 2016 <sup>5</sup>                  | unclear               | low        | unclear | unclear              | high     | low                   | low        | low     |
| 116         | Nomori et al, 2016 <sup>6</sup>               | low                   | unclear    | low     | high                 | high     | low                   | low        | low     |
| 117         | Yabuuchi et al, 2016 <sup>7</sup>             | low                   | low        | low     | low                  | unclear  | low                   | low        | low     |
| 2           | Ueda et al, 2015 <sup>8</sup>                 | high                  | low        | low     | high                 | unclear  | low                   | low        | low     |
| 3           | Murakami et al, 2015 <sup>9</sup>             | high                  | low        | low     | high                 | high     | unclear               | low        | low     |
| 11          | Kovacevic-Kusmierik, et al 2015 <sup>10</sup> | unclear               | low        | low     | unclear              | low      | low                   | low        | low     |
| 118         | Ohno et al, 2015 <sup>11</sup>                | low                   | low        | low     | low                  | low      | low                   | low        | low     |
| 122         | Hashimoto et al, 2015 <sup>12</sup>           | unclear               | low        | unclear | unclear              | unclear  | unclear               | low        | unclear |
| 123         | Choi et al, 2015 <sup>13</sup>                | unclear               | low        | unclear | unclear              | unclear  | low                   | low        | low     |
| 124         | Edvardsen et al 2015 <sup>14</sup>            | unclear               | low        | high    | unclear              | low      | low                   | low        | low     |
| 127         | Rangarajan et al, 2015 <sup>15</sup>          | unclear               | unclear    | low     | unclear              | low      | low                   | low        | low     |
| 12          | Simsek Veske et al, 2014 <sup>16</sup>        | low                   | low        | high    | unclear              | high     | high                  | low        | low     |
| 14          | Saito et al, 2014 <sup>17</sup>               | low                   | low        | high    | low                  | unclear  | low                   | low        | low     |
| 16          | Seok et al, 2014 <sup>18</sup>                | high                  | low        | low     | unclear              | high     | low                   | low        | low     |
| 128         | Takahashi, 2014 <sup>19</sup>                 | unclear               | low        | high    | unclear              | high     | low                   | low        | low     |
| 129         | Vos et al, 2014 <sup>20</sup>                 | unclear               | low        | unclear | low                  | unclear  | low                   | low        | low     |
| 130         | Marinov et al, 2014 <sup>21</sup>             | low                   | low        | high    | unclear              | unclear  | low                   | low        | low     |
| 131         | Franchi et al, 2014 <sup>22</sup>             | unclear               | low        | unclear | unclear              | unclear  | unclear               | low        | low     |
| 163         | Li et al, 2014 <sup>23</sup>                  | high                  | low        | low     | low                  | high     | low                   | low        | low     |
| 15          | Mizobuchi et al, 2014 <sup>24</sup>           | high                  | low        | low     | high                 | unclear  | low                   | low        | low     |
| 17          | Yanagita et al, 2013 <sup>25</sup>            | low                   | low        | low     | low                  | unclear  | low                   | low        | low     |
| 19          | Detterbeck et al, 2013 <sup>26</sup>          | high                  | low        | low     | high                 | high     | high                  | low        | low     |
| 21          | Westhoff et al, 2013 <sup>27</sup>            | low                   | low        | high    | low                  | low      | low                   | low        | low     |
| 132         | Chae et al, 2013 <sup>28</sup>                | low                   | low        | low     | low                  | low      | low                   | low        | low     |
| 134         | Marinov et al, 2013 <sup>29</sup>             | unclear               | low        | high    | unclear              | unclear  | low                   | low        | low     |
| 136         | Janssens et al, 2013 <sup>30</sup>            | unclear               | low        | unclear | unclear              | low      | low                   | low        | low     |
| 18          | Cukic, 2012 <sup>31</sup>                     | high                  | low        | high    | unclear              | high     | high                  | low        | low     |
| 20          | Kim et al, 2012 <sup>32</sup>                 | low                   | low        | high    | unclear              | high     | high                  | low        | low     |
| 22          | Comce et al,                                  | low                   | low        | high    | unclear              | high     | high                  | low        | low     |

|     |                                               |         |         |         |         |         |         |     |     |
|-----|-----------------------------------------------|---------|---------|---------|---------|---------|---------|-----|-----|
|     | 2011 <sup>33</sup>                            |         |         |         |         |         |         |     |     |
| 23  | Comce et al, 2011 <sup>34</sup>               | high    | unclear | high    | low     | low     | low     | low | low |
| 120 | Zhu et al, 2011 <sup>35</sup>                 | low     | low     | high    | low     | high    | low     | low | low |
| 138 | Ohno et al, 2011 <sup>36</sup>                | unclear | low     | low     | unclear | low     | low     | low | low |
| 139 | Holvoet et al, 2011 <sup>37</sup>             | high    | low     | low     | unclear | low     | high    | low | low |
| 140 | Papageorgiou et al, 2011 <sup>38</sup>        | unclear | low     | low     | unclear | unclear | unclear | low | low |
| 144 | Kovacevic-Kusmierek et al, 2011 <sup>39</sup> | unclear | low     | unclear | unclear | unclear | unclear | low | low |
| 25  | Pancieri et al, 2010 <sup>40</sup>            | low     | low     | low     | unclear | low     | high    | low | low |
| 26  | Morice et al, 2010 <sup>41</sup>              | low     | low     | high    | high    | low     | low     | low | low |
| 28  | Jimenez et al, 2010 <sup>42</sup>             | high    | low     | high    | low     | low     | low     | low | low |
| 145 | Caglar et al, 2010 <sup>43</sup>              | unclear | low     | high    | unclear | high    | low     | low | low |
| 146 | Yamashita, 2010 <sup>44</sup>                 | low     | low     | low     | low     | low     | low     | low | low |
| 150 | Eberhardt et al, 2010 <sup>45</sup>           | unclear | low     | low     | unclear | unclear | low     | low | low |
| 153 | Lian et al, 2010 <sup>46</sup>                | high    | low     | unclear | high    | low     | high    | low | low |
| 30  | Ueda et al, 2009 <sup>47</sup>                | unclear | low     | low     | unclear | high    | low     | low | low |
| 155 | Yoshimoto, 2009 <sup>48</sup>                 | low     | low     | low     | low     | low     | low     | low | low |
| 157 | Maestre et al, 2009 <sup>49</sup>             | unclear | low     | high    | unclear | high    | low     | low | low |
| 36  | Brunelli et al, 2007 <sup>50</sup>            | unclear | low     | high    | low     | unclear | low     | low | low |
| 37  | Brunelli et al, 2007 <sup>51</sup>            | low     | unclear | low     | low     | high    | low     | low | low |
| 160 | Ohno, 2007 <sup>52</sup>                      | low     | low     | low     | low     | low     | low     | low | low |
| 4   | Beyer et al, 2006 <sup>53</sup>               | high    | low     | high    | unclear | low     | high    | low | low |
| 38  | Mineo et al, 2006 <sup>54</sup>               | unclear | low     | high    | unclear | low     | low     | low | low |
| 39  | Win et al, 2006 <sup>55</sup>                 | unclear | low     | high    | low     | low     | low     | low | low |
| 40  | Varela et al, 2006 <sup>56</sup>              | high    | unclear | high    | low     | high    | low     | low | low |
| 43  | Wang, 2006 <sup>57</sup>                      | low     | low     | low     | low     | low     | unclear | low | low |
| 162 | Sudoh, 2006 <sup>58</sup>                     | low     | low     | low     | low     | high    | low     | low | low |
| 33  | Brunelli et al, 2005 <sup>59</sup>            | low     | low     | high    | low     | high    | low     | low | low |
| 45  | Sverzellati et al, 2005 <sup>60</sup>         | unclear | low     | low     | unclear | low     | low     | low | low |
| 46  | Sekine et al, 2005 <sup>61</sup>              | low     | low     | high    | low     | high    | low     | low | low |
| 47  | Liu et al, 2005 <sup>62</sup>                 | unclear | low     | high    | unclear | low     | low     | low | low |
| 48  | Win et al, 2004 <sup>63</sup>                 | unclear | low     | high    | unclear | low     | high    | low | low |
| 49  | Smulders et al, 2004 <sup>64</sup>            | high    | low     | low     | low     | high    | low     | low | low |
| 82  | Yasukawa et al, 2004 <sup>65</sup>            | high    | low     | low     | high    | high    | high    | low | low |
| 164 | Piai et al, 2004 <sup>66</sup>                | low     | low     | high    | low     | high    | low     | low | low |
| 165 | Ohno et al, 2004 <sup>67</sup>                | unclear | low     | low     | unclear | low     | low     | low | low |
| 50  | Koizumi et al, 2003 <sup>68</sup>             | high    | low     | low     | low     | high    | high    | low | low |
| 52  | Sekine et al, 2003 <sup>69</sup>              | high    | low     | high    | high    | unclear | low     | low | low |
| 53  | Bolliger et al, 2002 <sup>70</sup>            | unclear | low     | low     | unclear | low     | low     | low | low |
| 54  | Foroulis et al,                               | unclear | low     | low     | unclear | high    | low     | low | low |

|     |                                     |         |      |         |         |      |         |         |     |
|-----|-------------------------------------|---------|------|---------|---------|------|---------|---------|-----|
|     | 2002 <sup>71</sup>                  |         |      |         |         |      |         |         |     |
| 56  | Wu et al, 2002 <sup>72</sup>        | low     | low  | low     | low     | high | low     | low     | low |
| 57  | Edwards et al, 2001 <sup>73</sup>   | low     | low  | low     | unclear | low  | low     | low     | low |
| 58  | Beccaria et al, 2001 <sup>74</sup>  | low     | low  | low     | low     | high | low     | low     | low |
| 166 | Young et al, 1999 <sup>75</sup>     | high    | low  | low     | unclear | high | high    | low     | low |
| 63  | Furrer et al, 1997 <sup>76</sup>    | high    | low  | low     | unclear | high | high    | low     | low |
| 64  | Giordano et al, 1997 <sup>77</sup>  | unclear | low  | high    | unclear | low  | unclear | low     | low |
| 65  | Leone et al, 1997 <sup>78</sup>     | unclear | low  | high    | low     | high | unclear | low     | low |
| 66  | Larsen et al, 1997 <sup>79</sup>    | low     | low  | low     | low     | low  | low     | low     | low |
| 67  | Weiner et al, 1997 <sup>80</sup>    | unclear | low  | low     | unclear | high | low     | low     | low |
| 69  | Bolliger et al, 1996 <sup>81</sup>  | low     | low  | low     | low     | high | high    | low     | low |
| 168 | Gaissert et al, 1996 <sup>82</sup>  | high    | low  | high    | high    | high | unclear | low     | low |
| 172 | Kikuchi et al, 1996 <sup>83</sup>   | unclear | low  | high    | unclear | high | low     | low     | low |
| 70  | Imaeda et al, 1995 <sup>84</sup>    | unclear | low  | low     | low     | high | low     | low     | low |
| 71  | Izquierdo et al, 1995 <sup>85</sup> | unclear | high | high    | low     | low  | low     | low     | low |
| 72  | Zeiber et al, 1995 <sup>86</sup>    | low     | low  | high    | unclear | high | low     | low     | low |
| 73  | Hosokawa et al, 1995 <sup>87</sup>  | unclear | low  | low     | unclear | high | low     | low     | low |
| 74  | Giordano et al, 1995 <sup>88</sup>  | unclear | low  | high    | unclear | high | low     | low     | low |
| 169 | Bolliger, 1995 <sup>89</sup>        | low     | low  | low     | low     | high | low     | low     | low |
| 170 | Romessis et al, 1995 <sup>90</sup>  | unclear | low  | low     | low     | high | low     | low     | low |
| 76  | Khargi et al, 1994 <sup>91</sup>    | high    | low  | low     | unclear | high | high    | low     | low |
| 77  | Wu et al, 1994 <sup>92</sup>        | low     | low  | low     | low     | high | low     | low     | low |
| 171 | Cheon et al, 1994 <sup>93</sup>     | unclear | low  | high    | low     | high | low     | low     | low |
| 78  | Hirose et al, 1993 <sup>94</sup>    | unclear | low  | low     | unclear | high | unclear | low     | low |
| 79  | Omote et al, 1992 <sup>95</sup>     | unclear | low  | low     | unclear | high | high    | low     | low |
| 80  | Sangalli et al, 1992 <sup>96</sup>  | high    | low  | low     | high    | low  | high    | low     | low |
| 174 | Cangemi et al, 1992 <sup>97</sup>   | high    | low  | high    | unclear | high | unclear | unclear | low |
| 81  | Cordiner et al, 1991 <sup>98</sup>  | high    | low  | low     | unclear | high | high    | low     | low |
| 176 | Koizumi et al, 1991 <sup>99</sup>   | high    | low  | unclear | high    | high | low     | low     | low |
| 177 | Ashino et al, 1991 <sup>100</sup>   | unclear | low  | high    | unclear | high | unclear | low     | low |
| 195 | Wang, 1991 <sup>101</sup>           | high    | low  | low     | high    | high | unclear | low     | low |
| 86  | Mende et al, 1990 <sup>102</sup>    | unclear | low  | low     | unclear | high | unclear | low     | low |
| 88  | Markos et al, 1989 <sup>103</sup>   | low     | low  | low     | unclear | high | low     | low     | low |
| 89  | Huang et al, 1989 <sup>104</sup>    | unclear | low  | low     | low     | high | high    | low     | low |
| 90  | Nonoyama et al, 1988 <sup>105</sup> | low     | low  | high    | low     | high | high    | low     | low |
| 178 | Yoshikawa, 1988 <sup>106</sup>      | unclear | low  | high    | unclear | high | low     | low     | low |
| 179 | Nonoyama et al, 1988 <sup>107</sup> | unclear | low  | low     | unclear | high | low     | low     | low |
| 92  | Julius et al, 1987 <sup>108</sup>   | unclear | low  | low     | high    | high | high    | low     | low |

|     |                                              |         |         |      |         |      |         |      |     |
|-----|----------------------------------------------|---------|---------|------|---------|------|---------|------|-----|
| 95  | Veneskoski & Sovijärvi, 1986 <sup>109</sup>  | high    | low     | high | unclear | high | low     | low  | low |
| 96  | Egeblad et al, 1986 <sup>110</sup>           | unclear | low     | high | low     | high | low     | low  | low |
| 180 | Ladurie & Ranson-Bitker, 1986 <sup>111</sup> | high    | low     | low  | unclear | high | high    | low  | low |
| 98  | Veneskoski & Sovijärvi, 1985 <sup>112</sup>  | unclear | low     | low  | unclear | high | high    | low  | low |
| 183 | Nakahara et al, 1985 <sup>113</sup>          | unclear | low     | low  | unclear | high | high    | low  | low |
| 185 | Hara, 1985 <sup>114</sup>                    | unclear | low     | high | low     | high | low     | low  | low |
| 100 | Williams et al, 1984 <sup>115</sup>          | high    | low     | low  | high    | high | high    | low  | low |
| 101 | Bins et al, 1984 <sup>116</sup>              | high    | low     | low  | unclear | high | high    | low  | low |
| 103 | Bria et al, 1983 <sup>117</sup>              | high    | low     | high | high    | high | high    | low  | low |
| 104 | Ali et al, 1983 <sup>118</sup>               | high    | low     | high | high    | high | high    | high | low |
| 192 | Nakahara et al, 1983 <sup>119</sup>          | unclear | low     | low  | unclear | high | low     | low  | low |
| 193 | Loddenkemper et al, 1983 <sup>120</sup>      | low     | low     | low  | high    | low  | low     | low  | low |
| 99  | Nakahara et al, 1982 <sup>121</sup>          | high    | low     | low  | low     | high | low     | low  | low |
| 194 | Konishi, 1982 <sup>122</sup>                 | unclear | low     | high | high    | high | low     | low  | low |
| 106 | Ali et al, 1980 <sup>123</sup>               | high    | low     | high | unclear | high | unclear | low  | low |
| 189 | Taube & Konietzko, 1980 <sup>124</sup>       | low     | low     | low  | low     | high | low     | low  | low |
| 196 | Taube & Konietzko, 1980 <sup>125</sup>       | low     | low     | low  | unclear | high | low     | low  | low |
| 197 | Walkup et al, 1980 <sup>126</sup>            | unclear | low     | high | unclear | high | unclear | low  | low |
| 198 | Cooper et al, 1980 <sup>127</sup>            | low     | high    | high | low     | high | high    | low  | low |
| 199 | Wernly et al, 1980 <sup>128</sup>            | unclear | low     | high | unclear | low  | unclear | low  | low |
| 108 | Nicoli et al, 1979 <sup>129</sup>            | unclear | unclear | low  | high    | high | high    | low  | low |
| 110 | Lipscomb & Pride, 1977 <sup>130</sup>        | high    | low     | low  | high    | high | unclear | low  | low |
| 111 | Malm et al, 1977 <sup>131</sup>              | unclear | low     | low  | unclear | high | unclear | low  | low |
| 112 | Juhl & Frost, 1975 <sup>132</sup>            | unclear | low     | high | high    | high | low     | low  | low |
| 191 | Wever et al, 1975 <sup>133</sup>             | high    | low     | high | low     | high | low     | low  | low |
| 113 | Kristersson et al, 1973 <sup>134</sup>       | high    | low     | low  | high    | high | low     | low  | low |
| 114 | Kristersson et al, 1972 <sup>135</sup>       | unclear | low     | high | high    | high | low     | low  | low |

## References

1. Hara K, Izumi N, Tsukioka T, Chung K, Komatsu H, Toda M, et al. P3.16-032 Prediction of Postoperative Lung Function in Patients with Lung Cancer by Lung Lobe. *J Thorac Oncol*. 2017 Nov 1;12(11):S2355.
2. Fourdrain A, De FD, Lafitte S, Iquille J, Prevot F, Lorne E, et al. Quantitative computed tomography to predict postoperative FEV1 after lung cancer surgery. *J Thorac Dis*. 2017 Aug;9(8):2413–8.
3. Suh M, Kang Y-K, Ha S, Kim Y-I, Paeng JC, Cheon GJ, et al. Comparison of Two Different Segmentation Methods on Planar Lung Perfusion Scan with Reference to Quantitative Value on SPECT/CT. *Nucl Med Mol Imaging*. 2017 Jun;51(2):161–8.

4. Usuda K, Maeda S, Motomo N, Tanaka M, Ueno M, Machida Y, et al. Pulmonary Function After Lobectomy: Video-Assisted Thoracoscopic Surgery Versus Muscle-Sparing Mini-thoracotomy. *Indian J Surg.* 2017 Dec;79(6):504–9.
5. Yoo I, Y. A. Chung, J. K. Oh, E. K. Choi. Prediction of postoperative lung function in lung cancer patients using perfusion scintigraphy. *Mol Imaging Biol.* 2016 Dec;18(2 Supplement):S453–4.
6. Nomori H, Cong Y, Sugimura H. Systemic and regional pulmonary function after segmentectomy. *J Thorac Cardiovasc Surg.* 2016 Sep;152(3):747–53.
7. Yabuuchi H, Kawanami S, Kamitani T, Yonezawa M, Yamasaki Y, Yamanouchi T, et al. Prediction of post-operative pulmonary function after lobectomy for primary lung cancer: A comparison among counting method, effective lobar volume, and lobar collapsibility using inspiratory/expiratory CT. *Eur J Radiol.* 2016 Nov;85(11):1956–62.
8. Ueda K, Murakami J, Sano F, Hayashi M, Kobayashi T, Kunihiro Y, et al. Assessment of volume reduction effect after lung lobectomy for cancer. *J Surg Res.* 2015 Jul 1;197(1):176–82.
9. Murakami J, Ueda K, Sano F, Hayashi M, Tanaka N, Hamano K. Prediction of postoperative dyspnea and chronic respiratory failure. *J Surg Res.* 2015 May 1;195(1):303–10.
10. Kovacević-Kušmirek K, Kozak J, Pryt Ł, Bieńkiewicz M, Cichocki P, Kuśmirek J, et al. Perfusion lung scintigraphy for the prediction of postoperative residual pulmonary function in patients with lung cancer. *Nucl Med Rev.* 2015;18(2):70–7.
11. Ohno Y, Seki S, Koyama H, Yoshikawa T, Matsumoto S, Takenaka D, et al. 3D ECG- and respiratory-gated non-contrast-enhanced (CE) perfusion MRI for postoperative lung function prediction in non-small-cell lung cancer patients: A comparison with thin-section quantitative computed tomography, dynamic CE-perfusion MRI, and perfusion scan. *J Magn Reson Imaging JMRI.* 2015 Aug;42(2):340–53.
12. Hashimoto M, J Hanaoka, K Teramoto, T Igarashi. Prediction of postoperative pulmonary function using CT volumetry. *J Thorac Oncol.* 2015 Sep;(9 SUPPL. 2):S558.
13. Choi H, D Teeters, D Raymond, X Wang, P Mazzone. The accuracy of quantitative CT scan based prediction of post-lung resection FEV1. *Chest.* 2015 Oct;(4 MEETING ABSTRACT):no pagination.
14. Edvardsen E, S A Anderssen, F Borchsenius, OH Skjongsberg. Predicted versus observed pulmonary function and peak oxygen uptake after lung cancer surgery. *Eur Respir J.* 2015 Sep;(SUPPL. 59):no pagination.
15. Rangarajan V, Purandare N, A A, S S, S N, P R, et al. Comparison of predicted FEV1 and observed FEV1 post lung surgery Using lung Perfusion scintigraphy. *J Nucl Med Mol Imaging.* 2015 Oct;(1 SUPPL. 1):S63–4.
16. Şimşek Veske N, Sökücü SN, Günlüoğlu G, Seyhan EC, Dalar L, Altın S. Place of vibration response imaging in preoperative lung cancer patients. *Tuberk Ve Toraks.* 2014;62(4):279–85.
17. Saito H, Nakagawa T, Ito M, Imai K, Ono T, Minamiya Y. Pulmonary function after lobectomy versus segmentectomy in patients with stage I non-small cell lung cancer. *World J Surg.* 2014 Aug;38(8):2025–31.
18. Seok Y, Jheon S, Cho S. Serial changes in pulmonary function after video-assisted thoracic surgery lobectomy in lung cancer patients. *Thorac Cardiovasc Surg.* 2014 Mar;62(2):133–9.
19. Takahashi N. Assessment of predicted post-lobectomy lung function by means of a new method of anatomical residual lung volume ratio. [Japanese]. *Respir Circ.* 2014 Dec;(12):1213–9.
20. Vos W, Janssens A, Van Holsbeke C, Leemans G, De Backer J, De Backer W, et al. Functional Respiratory Imaging To Predict Post-Operative Forced Expiratory Volume In 1 Second After Lobectomy/Pneumonectomy. In: C38 LICENSE TO CALL A SURGEON: INVASIVE MANAGEMENT OF LUNG DISEASE [Internet]. American Thoracic Society; 2014. p. A4362–A4362. (American Thoracic Society International Conference Abstracts). Available from: [https://www.atsjournals.org/doi/abs/10.1164/ajrccm-conference.2014.189.1\\_MeetingAbstracts.A4362](https://www.atsjournals.org/doi/abs/10.1164/ajrccm-conference.2014.189.1_MeetingAbstracts.A4362)
21. Marinov B, Chapkanov A, Todorova M, Paskalev G, Kostianev S. Smoking status affects VRI assisted prediction of postoperative FEV1 and DLCO in patients with lung cancer. *Eur Respir J.* 2014 Sep 1;44(Suppl 58):P3257.
22. Franchi P, A.r L, E D, M O, R I, M.r C, et al. Role of MDCT-virtual lobectomy in the prediction of post-operative lung function in patients undergoing surgical lobectomy. *J Thorac Imaging.* 2014 May;(3):W27.
23. Li M, Liang C, Guo J, Ma Y, Zhou L, Yang P, et al. [The clinical application value of dual source CT quantification volume imaging to forecast lung cancer patients' postoperative pulmonary function changing: a prospective study]. *Zhonghua Wai Ke Za Zhi.* 2014 Oct;52(10):734–8.
24. Mizobuchi T, Wada H, Sakairi Y, Suzuki H, Nakajima T, Tagawa T, et al. Spirometric and radiological evaluation of the remnant lung long after major pulmonary resection: can compensatory phenomena be recognized in clinical cases? *Surg Today.* 2014 Sep;44(9):1735–43.

25. Yanagita H, Honda N, Nakayama M, Watanabe W, Shimizu Y, Osada H, et al. Prediction of postoperative pulmonary function: preliminary comparison of single-breath dual-energy xenon CT with three conventional methods. *Jpn J Radiol.* 2013 Jun;31(6):377–85.
26. Detterbeck F, Gat M, Miller D, Force S, Chin C, Fernando H, et al. A new method to predict postoperative lung function: quantitative breath sound measurements. *Ann Thorac Surg.* 2013 Mar;95(3):968–75.
27. Westhoff M, Herth F, Albert M, Dienemann H, Eberhardt R. A new method to predict values for postoperative lung function and surgical risk of lung resection by quantitative breath sound measurements. *Am J Clin Oncol.* 2013 Jun;36(3):273–8.
28. Chae EJ, Kim N, Seo JB, Park J-Y, Song J-W, Lee HJ, et al. Prediction of postoperative lung function in patients undergoing lung resection: dual-energy perfusion computed tomography versus perfusion scintigraphy. *Invest Radiol.* 2013 Aug;48(8):622–7.
29. Marinov B, Chapkanov A, Todorova M, Paskalev G, Kostianev S. The utility of vibration response imaging for calculation of ppoFEV1 and ppoDLCO in patients with lung cancer referred for resection - The influence of coexisting COPD. *Eur Respir J.* 2013 Sep 1;42(Suppl 57):196.
30. Janssens A, C Van Holsbeke, W Vos W, P Van Schil P, L Carp L, E Oostveen E, et al. Is postoperative fev1 (poFEV1) more accurately estimated by functional respiratory imaging (FRI) than by conventional methods? *J Thorac Oncol.* 2013 Nov;(SUPPL. 2):S828.
31. Cukic V. Preoperative prediction of lung function in pneumonectomy by spirometry and lung perfusion scintigraphy. *Acta Inform Medica AIM J Soc Med Inform Bosnia Herzeg Cas Drustva Za Med Inform BiH.* 2012 Dec;20(4):221–5.
32. Kim HK, Yoo D, Sung HK, Lee HJ, Choi YH. Vibration Response Imaging in Prediction of Pulmonary Function After Pulmonary Resection. *Ann Thorac Surg.* 2012 Nov 1;94(5):1680–6.
33. Comce F, Bingol Z, Kiyani E, Tanju S, Toker A, Cagatay P, et al. The Role of a Vibration Response Imaging Device in the Selection of Patients for Lung Resection Surgery. *Respir Care.* 2011 Jun 17;
34. Comce F, Bingol Z, Kiyani E, Tanju S, Toker A, Cagatay P, et al. Vibration-response imaging versus quantitative perfusion scintigraphy in the selection of patients for lung-resection surgery. *Respir Care.* 2011 Dec;56(12):1936–41.
35. Zhu X, Zhao M, Liu C, Zhou J. Prediction of the postoperative pulmonary function in lung cancer patients with borderline function using ventilation-perfusion scintigraphy. *Nucl Med Commun.* 2012 Mar;33(3):283–7.
36. Ohno Y, Koyama H, Nogami M, Takenaka D, Onishi Y, Matsumoto K, et al. State-of-the-art radiological techniques improve the assessment of postoperative lung function in patients with non-small cell lung cancer. *Eur J Radiol.* 2011 Jan;77(1):97–104.
37. Holvoet T, van Meerbeeck JP, Van De Wiele C, Salhi B, Derom E. Quantitative Perfusion Scintigraphy or Anatomic Segment Method in lung cancer resection. *Lung Cancer Amst Neth.* 2011 Nov;74(2):212–8.
38. Papageorgiou CV, Kaltsakas G, Misthos P, Tsangaridou I, Chaimala D, Koulouris NG. Prediction of postoperative FEV1 and chronic dyspnoea using quantitative computed tomography (CT) in lung resection candidates. *Eur Respir J.* 2011 Sep 1;38(Suppl 55):1913.
39. Kovacevic-Kusmierek K, J Kozak, M Bienkiewicz, P Cichocki, J Kusmierek, Plachcinska A. Accuracy of radionuclide methods predicting postoperative residual lung function. *Nucl Med Rev.* 2014;(Supplement A):A7–8.
40. Pancieri MVC, Cataneo DC, Montovani JC, Cataneo AJM. Comparison between actual and predicted postoperative stair-climbing test, walk test and spirometric values in patients undergoing lung resection. *Acta Cir Bras.* 2010 Dec;25(6):535–40.
41. Morice RC, Jimenez CA, Eapen GA, Mehran RJ, Keus L, Ost D. Using quantitative breath sound measurements to predict lung function following resection. *J Cardiothorac Surg.* 2010 Oct 12;5:81.
42. Jimenez U, Marina N, de Santamaria EL, Pac JJ, Galdiz JB. Evaluation of the utility of vibration response imaging device and Operation Planning Software in the assessment of patients before lung resection surgery. *Eur J Cardio-Thorac Surg Off J Eur Assoc Cardio-Thorac Surg.* 2010 May;37(5):1185–90.
43. Caglar M, Kara M, Aksoy T, Kiratli PO, Karabulut E, Dogan R. Is the predicted postoperative FEV1 estimated by planar lung perfusion scintigraphy accurate in patients undergoing pulmonary resection? Comparison of two processing methods. *Ann Nucl Med.* 2010 Jul;24(6):447–53.
44. Yamashita CM, Langridge J, Hergott CA, Inculet RI, Malthaner RA, Lefcoe MS, et al. Predicting postoperative FEV1 using spiral computed tomography. *Acad Radiol.* 2010 May;17(5):607–13.
45. Eberhardt R, Gompelmann D, Gruenewald C, Dienemann H, Herth FJ. Using a novel lung sound software to estimate pulmonary function after lung resection surgery. In: D42 INTERVENTIONAL PULMONOLOGY AND THORACIC SURGERY [Internet]. American Thoracic Society; 2010. p.

- A5840–A5840. (American Thoracic Society International Conference Abstracts). Available from: [https://www.atsjournals.org/doi/abs/10.1164/ajrccm-conference.2010.181.1\\_MeetingAbstracts.A5840](https://www.atsjournals.org/doi/abs/10.1164/ajrccm-conference.2010.181.1_MeetingAbstracts.A5840)
46. Lian MCS, W H Sudin, K M Nor, L Mathews, Fui C.c. Prediction of post-operative pulmonary function after pulmonary lobectomy using quantitative ct volumetric analysis derived equation. *Heart Surg Forum*. 2010 Oct;(SUPPL. 2):S94.
  47. Ueda K, Tanaka T, Li T-S, Tanaka N, Hamano K. Quantitative computed tomography for the prediction of pulmonary function after lung cancer surgery: a simple method using simulation software. *Eur J Cardio-Thorac Surg Off J Eur Assoc Cardio-Thorac Surg*. 2009 Mar;35(3):414–8.
  48. Yoshimoto K, Nomori H, Mori T, Kobayashi H, Ohba Y, Shibata H, et al. Prediction of pulmonary function after lung lobectomy by subsegments counting, computed tomography, single photon emission computed tomography and computed tomography: a comparative study. *Eur J Cardio-Thorac Surg Off J Eur Assoc Cardio-Thorac Surg*. 2009 Mar;35(3):408–13.
  49. Maestre UJ, N M Malanda, L H Perez, N U E Lugariza-Ares, M L Martin, J C R Sanchez, et al. Evaluation of VRI (vibration response imaging) utility in the prediction of postoperative function after lung resection surgery. *Interact Cardiovasc Thorac Surg*. 2009 Jul;(SUPPL. 1):S11.
  50. Brunelli A, Refai M, Salati M, Xiumé F, Sabbatini A. Predicted versus observed FEV1 and DLCO after major lung resection: a prospective evaluation at different postoperative periods. *Ann Thorac Surg*. 2007 Mar;83(3):1134–9.
  51. Brunelli A, Xiumé F, Refai M, Salati M, Marasco R, Sciarra V, et al. Evaluation of expiratory volume, diffusion capacity, and exercise tolerance following major lung resection: a prospective follow-up analysis. *Chest*. 2007 Jan;131(1):141–7.
  52. Ohno Y, Koyama H, Takenaka D, Nogami M, Kotani Y, Nishimura Y, et al. Coregistered ventilation and perfusion SPECT using krypton-81m and Tc-99m-labeled macroaggregated albumin with multislice CT utility for prediction of postoperative lung function in non-small cell lung cancer patients. *Acad Radiol*. 2007 Jul;14(7):830–8.
  53. Beyer F, Heindel W, Hoffknecht P, Kuhnigk J, Dicken V, Lange T, et al. [CT-based software-supported prediction of the postoperative lung function after partial resection of the lung]. *ROFO Fortschr Geb Rontgenstr Nuklearmed*. 2006 Sep;178(9):872–9.
  54. Mineo TC, Schillaci O, Pompeo E, Mineo D, Simonetti G. Usefulness of lung perfusion scintigraphy before lung cancer resection in patients with ventilatory obstruction. *Ann Thorac Surg*. 2006 Nov;82(5):1828–34.
  55. Win T, Tasker AD, Groves AM, White C, Ritchie AJ, Wells FC, et al. Ventilation-perfusion scintigraphy to predict postoperative pulmonary function in lung cancer patients undergoing pneumonectomy. *AJR Am J Roentgenol*. 2006 Nov;187(5):1260–5.
  56. Varela G, Brunelli A, Rocco G, Marasco R, Jiménez MF, Sciarra V, et al. Predicted versus observed FEV1 in the immediate postoperative period after pulmonary lobectomy. *Eur J Cardio-Thorac Surg Off J Eur Assoc Cardio-Thorac Surg*. 2006 Oct;30(4):644–8.
  57. Wang J-S, Abboud RT, Wang L-M. Effect of lung resection on exercise capacity and on carbon monoxide diffusing capacity during exercise. *Chest*. 2006 Apr;129(4):863–72.
  58. Sudoh M, Ueda K, Kaneda Y, Mitsutaka J, Li T-S, Suga K, et al. Breath-hold single-photon emission tomography and computed tomography for predicting residual pulmonary function in patients with lung cancer. *J Thorac Cardiovasc Surg*. 2006 May;131(5):994–1001.
  59. Brunelli A, Sabbatini A, Xiumé F, Al Refai M, Borri A, Salati M, et al. A model to predict the decline of the forced expiratory volume in one second and the carbon monoxide lung diffusion capacity early after major lung resection. *Interact Cardiovasc Thorac Surg*. 2005 Feb 1;4(1):61–5.
  60. Sverzellati N, Chetta A, Calabrò E, Carbognani P, Internullo E, Olivieri D, et al. Reliability of quantitative computed tomography to predict postoperative lung function in patients with chronic obstructive pulmonary disease having a lobectomy. *J Comput Assist Tomogr*. 2005 Dec;29(6):819–24.
  61. Sekine Y, Chiyo M, Iwata T, Yasufuku K, Furukawa S, Amada Y, et al. Perioperative rehabilitation and physiotherapy for lung cancer patients with chronic obstructive pulmonary disease. *Jpn J Thorac Cardiovasc Surg Off Publ Jpn Assoc Thorac Surg Nihon Kyobu Geka Gakkai Zasshi*. 2005 May;53(5):237–43.
  62. Liu F, Han P, Feng G, Liang B, Xiao J, Tian Z, et al. Using quantitative CT to predict postoperative pulmonary function in patients with lung cancer. *Chin Med J (Engl)*. 2005 May 5;118(9):742–6.
  63. Win T, Laroche CM, Groves AM, White C, Wells FC, Ritchie AJ, et al. Use of quantitative lung scintigraphy to predict postoperative pulmonary function in lung cancer patients undergoing lobectomy. *Ann Thorac Surg*. 2004 Oct;78(4):1215–8.
  64. Smulders SA, Smeenk FWJM, Janssen-Heijnen MLG, Postmus PE. Actual and predicted postoperative changes in lung function after pneumonectomy: a retrospective analysis. *Chest*. 2004 May;125(5):1735–41.



65. Yasukawa M, Nakagawa M, Sakaguchi T, Iwasaki S, Sasaki N. Prediction of postoperative pulmonary function after pneumonectomy for lung cancer. [Japanese]. *J Lung Cancer*. 2004 Oct;(6):683–7.
66. Piai DB, Quagliatto R, Toro I, Cunha Neto C, Etchbehere E, Camargo E. The use of SPECT in preoperative assessment of patients with lung cancer. *Eur Respir J*. 2004 Aug;24(2):258–62.
67. Ohno Y, Hatabu H, Higashino T, Takenaka D, Watanabe H, Nishimura Y, et al. Dynamic perfusion MRI versus perfusion scintigraphy: prediction of postoperative lung function in patients with lung cancer. *AJR Am J Roentgenol*. 2004 Jan;182(1):73–8.
68. Koizumi K, Haraguchi S, Hirata T, Hirai K, Mikami I, Fukushima M, et al. Video-assisted lobectomy for a lung cancer patient with chronic obstructive pulmonary disease. *Jpn J Thorac Cardiovasc Surg Off Publ Jpn Assoc Thorac Surg Nihon Kyobu Geka Gakkai Zasshi*. 2003 Nov;51(11):569–76.
69. Sekine Y, Iwata T, Chiyo M, Yasufuku K, Motohashi S, Yoshida S, et al. Minimal alteration of pulmonary function after lobectomy in lung cancer patients with chronic obstructive pulmonary disease. *Ann Thorac Surg*. 2003 Aug;76(2):356–61; discussion 362.
70. Bolliger CT, Gückel C, Engel H, Stöhr S, Wyser CP, Schoetza A, et al. Prediction of functional reserves after lung resection: comparison between quantitative computed tomography, scintigraphy, and anatomy. *Respir Int Rev Thorac Dis*. 2002;69(6):482–9.
71. Foroulis CN, Kotoulas C, Konstantinou M, Lioulias A. Is the reduction of forced expiratory lung volumes proportional to the lung parenchyma resection, 6 months after pneumonectomy? *Eur J Cardio-Thorac Surg Off J Eur Assoc Cardio-Thorac Surg*. 2002 May;21(5):901–5.
72. Wu M-T, Pan H-B, Chiang AA, Hsu H-K, Chang H-C, Peng N-J, et al. Prediction of Postoperative Lung Function in Patients with Lung Cancer. *Am J Roentgenol*. 2002 Mar 1;178(3):667–72.
73. Edwards JG, Duthie DJ, Waller DA. Lobar volume reduction surgery: a method of increasing the lung cancer resection rate in patients with emphysema. *Thorax*. 2001 Oct;56(10):791–5.
74. Beccaria M, Corsico A, Fulgoni P, Zoia MC, Casali L, Orlandoni G, et al. Lung cancer resection: the prediction of postsurgical outcomes should include long-term functional results. *Chest*. 2001 Jul;120(1):37–42.
75. Young Min Koh, Park SJ, Suh GY, Chung MP, H K, Kwon O.j, et al. Preservation of pulmonary function after sleeve lobectomy in patients with lung cancer. [Korean]. *Tuberc Respir Dis*. 1999;(1):35–41.
76. Furrer M, Rechsteiner R, Eigenmann V, Signer C, Althaus U, Ris HB. Thoracotomy and thoracoscopy: postoperative pulmonary function, pain and chest wall complaints. *Eur J Cardio-Thorac Surg Off J Eur Assoc Cardio-Thorac Surg*. 1997 Jul;12(1):82–7.
77. Giordano A, Calcagni ML, Meduri G, Valente S, Galli G. Perfusion lung scintigraphy for the prediction of postlobectomy residual pulmonary function. *Chest*. 1997 Jun;111(6):1542–7.
78. Leone G, Volpino P, Galati G, Fiori E, Baccarini A, Boccuzzi M, et al. [Evaluation of the respiratory function by lung scintigraphy in patients candidates for pulmonary resection]. *Il G Chir*. 1997 May;18(5):301–7.
79. Larsen KR, Lund JO, Svendsen UG, Milman N, Petersen BN. Prediction of post-operative cardiopulmonary function using perfusion scintigraphy in patients with bronchogenic carcinoma. *Clin Physiol Oxf Engl*. 1997 May;17(3):257–67.
80. Weiner P, Man A, Weiner M, Rabner M, Waizman J, Magadle R, et al. The effect of incentive spirometry and inspiratory muscle training on pulmonary function after lung resection. *J Thorac Cardiovasc Surg*. 1997 Mar;113(3):552–7.
81. Bolliger CT, Wyser C, Roser H, Stulz P, Solèr M, Perruchoud AP. [Lung scintigraphy and ergospirometry in prediction of postoperative course in lung resection candidates with increased risk of postoperative complications]. *Pneumol Stuttg Ger*. 1996 May;50(5):334–41.
82. Gaissert HA, Mathisen DJ, Moncure AC, Hilgenberg AD, Grillo HC, Wain JC. Survival and function after sleeve lobectomy for lung cancer. *J Thorac Cardiovasc Surg*. 1996 May;111(5):948–53.
83. Kikuchi K, Ishii Y, Kitamura S. Prediction of Postoperative Lung Function in Patients with Lung Cancer and Chronic Obstructive Pulmonary Disease. *Jpn J Thorac Dis*. 1996 Oct 25;34(10):1071–6.
84. Imaeda T, Kanematsu M, Asada S, Seki M, Matsui E, Doi H, et al. Prediction of pulmonary function after resection of primary lung cancer. Utility of inhalation-perfusion SPECT imaging. *Clin Nucl Med*. 1995 Sep;20(9):792–9.
85. Izquierdo JM, Pac JJ, Casanova J, Vara F, Cortés J, Fombellida J, et al. [Lung resection surgery in patients with functional limits]. *Arch Bronconeumol*. 1995 Sep;31(7):328–32.
86. Zeiher BG, Gross TJ, Kern JA, Lanza LA, Peterson MW. Predicting postoperative pulmonary function in patients undergoing lung resection. *Chest*. 1995 Jul;108(1):68–72.
87. Hosokawa N, Tanabe M, Satoh K, Takashima H, Ohkawa M, Maeda M, et al. [Prediction of postoperative pulmonary function using 99mTc-MAA perfusion lung SPECT]. *Nihon Igaku Hoshasen Gakkai Zasshi Nippon Acta Radiol*. 1995 May;55(6):414–22.

88. Giordano A, Calcagni ML, Rossi B, D'Ugo D, Corbo GM, Fumagalli G, et al. [The scintigraphic prediction of residual lung function after lobectomy in patients with bronchial carcinoma]. *Radiol Med (Torino)*. 1995 Apr;89(4):501–5.
89. Bolliger CT, Wyser C, Roser H, Solèr M, Perruchoud AP. Lung scanning and exercise testing for the prediction of postoperative performance in lung resection candidates at increased risk for complications. *Chest*. 1995 Aug;108(2):341–8.
90. Romessis M, F Mucilli, G Bruni, R Massari. The predicting residual pulmonary function after pulmonary resection. [Italian]. *Chirurgia (Bucur)*. 1995;(5-6):218–21.
91. Khargi K, Duurkens VA, Verzijlbergen FF, Huysmans HA, Knaepen PJ. Pulmonary function after sleeve lobectomy. *Ann Thorac Surg*. 1994 May;57(5):1302–4.
92. Wu MT, Chang JM, Chiang AA, Lu JY, Hsu HK, Hsu WH, et al. Use of quantitative CT to predict postoperative lung function in patients with lung cancer. *Radiology*. 1994 Apr;191(1):257–62.
93. Cheon Y.-K, Y.-I K, J.-G Y, J.-I Z, Y.-M S, S.-M L, et al. Comparison of inhalation scan and perfusion scan for the prediction of postoperative pulmonary function. *Tuberc Respir Dis*. 1994;(2):111–9.
94. Hirose Y, Imaeda T, Doi H, Kokubo M, Sakai S, Hirose H. Lung perfusion SPECT in predicting postoperative pulmonary function in lung cancer. *Ann Nucl Med*. 1993 May;7(2):123–6.
95. Omote Y, Maeda T, Ikeda K, Kubo Y. [Examination of post operative split lung function using quantitative xenon 133 (133Xe) inhalation scan]. *Zasshi J Nihon Kyobu Geka Gakkai*. 1992 Dec;40(12):2205–11.
96. Sangalli M, Spiliopoulos A, Mégevand R. Predictability of FEV1 after pulmonary resection for bronchogenic carcinoma. *Eur J Cardio-Thorac Surg Off J Eur Assoc Cardio-Thorac Surg*. 1992;6(5):242–5.
97. Cangemi V, Volpino P, Caputo V, D'Andrea N, R T, E G, et al. Quantitative and qualitative regional ventilation-perfusion scanning to predict postsurgical lung function and postoperative morbidity and mortality in patients submitted to polmonary resectional surgery. [Italian]. *Chirurgia (Bucur)*. 1992;(12):731–7.
98. Cordiner A, De Carlo F, De Gennaro R, Pau F, Flore F. Prediction of postoperative pulmonary function following thoracic surgery for bronchial carcinoma. *Angiology*. 1991 Dec;42(12):985–9.
99. Koizumi K, Tanaka S, Shioda M, Haraguchi S, Masaki Y, Morota T, et al. [Simplified prediction of postoperative lung function by plain chest roentgenogram in patients with primary lung cancer--in correlation to postoperative respiratory complications]. *Zasshi J Nihon Kyobu Geka Gakkai*. 1991 Sep;39(9):1758–64.
100. Ashino Y, Chida M, Suzuki S, Nasu G, Isogami K, Kubo H, et al. [Lung function after lobectomy in chronic pulmonary emphysema]. *Zasshi J Nihon Kyobu Geka Gakkai*. 1991 Sep;39(9):1752–7.
101. Wang J. [Clinical value of perfusion lung scanning in the surgical treatment of lung cancer]. *Zhonghua Yi Xue Za Zhi*. 1991 Nov;71(11):620–2, 44.
102. Mende T, Orlick M, Fischbeck O, Neef H. [Risk assessment of bronchial cancer surgery using quantitative lung perfusion scintigraphy]. *Nucl Nucl Med*. 1990 Dec;29(6):274–7.
103. Markos J, Mullan BP, Hillman DR, Musk AW, Antico VF, Lovegrove FT, et al. Preoperative assessment as a predictor of mortality and morbidity after lung resection. *Am Rev Respir Dis*. 1989 Apr;139(4):902–10.
104. Huang WL, Chiang CD, King SL, Yiin KT, Jih KS, Lin TM, et al. [Prediction of postoperative pulmonary function in the patient undergoing pneumonectomy using combined pulmonary function test and ventilation/perfusion scintiphotography]. *Zhonghua Yi Xue Za Zhi Chin Med J Free China Ed*. 1989 Mar;43(3):185–90.
105. Nonoyama A, Saito Y, Ohmoto K, Umemoto M, Sakurai Y, Tanaka K, et al. [Pneumonectomy in lung cancer in patients over 70 years old--prediction of postpneumonectomy pulmonary function]. *Zasshi J Nihon Kyobu Geka Gakkai*. 1988 Jul;36(7):1096–105.
106. Yoshikawa K. Prediction of postoperative lung function after pulmonary resection. *Nippon Kyobu Geka Gakkai Zasshi*. 1988;36(11):2437–46.
107. Nonoyama A, Saito Y, Tanaka K, Ohmoto K, Umemoto M, Sakurai Y, et al. [Prediction of postpneumonectomy pulmonary function using perfusion lung scanning]. *Zasshi J Nihon Kyobu Geka Gakkai*. 1988 Oct;36(10):2221–8.
108. Julius AJ, de Jong D, van Deutekom H, Heidendal GA, den Otter G, Kester AD. The value of 99mTc macroaggregated albumin lung perfusion scanning in the prediction of postpneumonectomy function and pulmonary artery pressure. *Scand J Thorac Cardiovasc Surg*. 1987;21(1):81–5.
109. Veneskoski T, Sovijärvi AR. Prediction of ventilatory function after subtotal lung resection using preoperative dynamic spirometry and radiospirometry. *Eur J Respir Dis*. 1986 Mar;68(3):167–72.
110. Egeblad K, Aunsholt NA, Funder V, Nielsen PH. A Simple method for predicting pulmonary function after lung resection. *Scand J Thorac Cardiovasc Surg*. 1986 Jan 1;20(2):103–7.

111. Ladurie ML, Ranson-Bitker B. Uncertainties in the expected value for forced expiratory volume in one second after surgery. *Chest*. 1986 Aug;90(2):222–8.
112. Veneskoski T, Sovijärvi A. <sup>133</sup>Xe radiosprometry in prediction of ventilatory function and vital capacity after pneumonectomy in patients with an endobronchial tumour. *Ann Chir Gynaecol*. 1985;74(6):256–60.
113. Nakahara K, Monden Y, Ohno K, Fujii Y, Maeda H, Fujimoto Y, et al. Prediction of lung cancer spread and functional resectability by <sup>133</sup>Xe radiosprometry. *Jpn J Surg*. 1985 Jul;15(4):254–9.
114. Hara F. Prediction of postoperative pulmonary function in lung cancer patient using corrected lateral radionuclide lung image. *Nippon Kyobu Geka Gakkai Zasshi*. 1985;33(6):889–95.
115. Williams AJ, Cayton RM, Harding LK, Mostafa AB, Matthews HR. Quantitative lung scintigrams and lung function in the selection of patients for pneumonectomy. *Br J Dis Chest*. 1984 Apr;78(2):105–12.
116. Bins MC, Wever AM, Pauwels EK, van der Velde EA. Krypton-81m ventilation studies as a parameter for lung capacity after lobectomy. *Eur J Nucl Med*. 1984;9(7):312–5.
117. Bria WF, Kanarek DJ, Kazemi H. Prediction of postoperative pulmonary function following thoracic operations. Value of ventilation-perfusion scanning. *J Thorac Cardiovasc Surg*. 1983 Aug;86(2):186–92.
118. Ali MK, Ewer MS, Atallah MR, Mountain CF, Dixon CL, Johnston DA, et al. Regional and overall pulmonary function changes in lung cancer. Correlations with tumor stage, extent of pulmonary resection, and patient survival. *J Thorac Cardiovasc Surg*. 1983 Jul;86(1):1–8.
119. Nakahara K, Fujimoto Y, Ikeda M, Maeda H, Miyoshi S, Kitagawa Y, et al. [Analysis of the correlation between predicted and measured post-operative respiratory function in primary lung cancer]. *Kyobu Geka*. 1983 Dec;36(11):863–6.
120. Loddenkemper R, Gabler A, Göbel D. Criteria of functional operability in patients with bronchial carcinoma: preoperative assessment of risk and prediction of postoperative function. *Thorac Cardiovasc Surg*. 1983 Dec;31(6):334–7.
121. Nakahara K, S Miyoshi, T Kido. Prediction of the postoperative lung function in patients with primary lung cancer. [Japanese]. *J Lung Cancer*. 1982;(4):429–34.
122. Konishi H. Prediction of postoperative respiratory function of lung cancer patients using quantitative lung scans. *Nippon Kyobu Geka Gakkai Zasshi*. 1982;30(11):1784–95.
123. Ali MK, Mountain CF, Ewer MS, Johnston D, Haynie TP. Predicting loss of pulmonary function after pulmonary resection for bronchogenic carcinoma. *Chest*. 1980 Mar;77(3):337–42.
124. Taube K, Konietzko N. [Can the effect of pneumonectomy on cardiopulmonary function be anticipated? (author's transl)]. *Prax Klin Pneumol*. 1980 Sep;34(9):548–54.
125. Taube K, Konietzko N. Prediction of postoperative cardiopulmonary function in patients undergoing pneumonectomy. *Thorac Cardiovasc Surg*. 1980 Oct;28(5):348–51.
126. Walkup RH, Vossel LF, Griffin JP, Proctor RJ. Prediction of postoperative pulmonary function with the lateral position test. A prospective study. *Chest*. 1980 Jan;77(1):24–7.
127. Cooper WR, Guerrant JL, Teates CD. Prediction of postoperative respiratory function in patients undergoing lung resection. *Va Med*. 1980 Apr;107(4):264–8.
128. Wernly JA, DeMeester TR, Kirchner PT, Myerowitz PD, Oxford DE, Golomb HM. Clinical value of quantitative ventilation-perfusion lung scans in the surgical management of bronchogenic carcinoma. *J Thorac Cardiovasc Surg*. 1980 Oct;80(4):535–43.
129. Nicoli MM, Jammes Y, Fornaris E, Giacchero G, Coutant P. [<sup>133</sup>Xe radiosprometry: prediction of VC and FEV1 (author's transl)]. *Respir Int Rev Thorac Dis*. 1979;37(4):208–14.
130. Lipscomb DJ, Pride NB. Ventilation and perfusion scans in the preoperative assessment of bronchial carcinoma. *Thorax*. 1977 Dec;32(6):720–5.
131. Malm A, Arborelius M, Kristersson S. [Pathophysiology after resections of the lung (author's transl)]. *Zentralbl Chir*. 1977;102(10):585–91.
132. Juhl B, Frost N. A comparison between measured and calculated changes in the lung function after operation for pulmonary cancer. *Acta Anaesthesiol Scand Suppl*. 1975;57:39–45.
133. Wever AMJ, J J Klein, H Beekhuis. Prediction by means of regional <sup>133</sup>Xe radiosprometry of the spirometric pulmonary function after pneumonectomy (Dutch). [Dutch]. *Ned Tijdschr Geneesk*. 1975;(21):825–9.
134. Kristersson S, Arborelius M, Jungquist G, Lilja B, Svanberg L. Prediction of ventilatory capacity after lobectomy. *Scand J Respir Dis*. 1973;54(6):315–25.
135. Kristersson S, Lindell S-E, Svanberg L. Prediction of Pulmonary Function Loss Due to Pneumonectomy Using <sup>133</sup>Xe-Radiosprometry. *CHEST*. 1972 Dec 1;62(6):694–8.

### Appendix 3 Forest plots for mean difference in FEV<sub>1</sub>

Figure A. Forest plot for segment counting

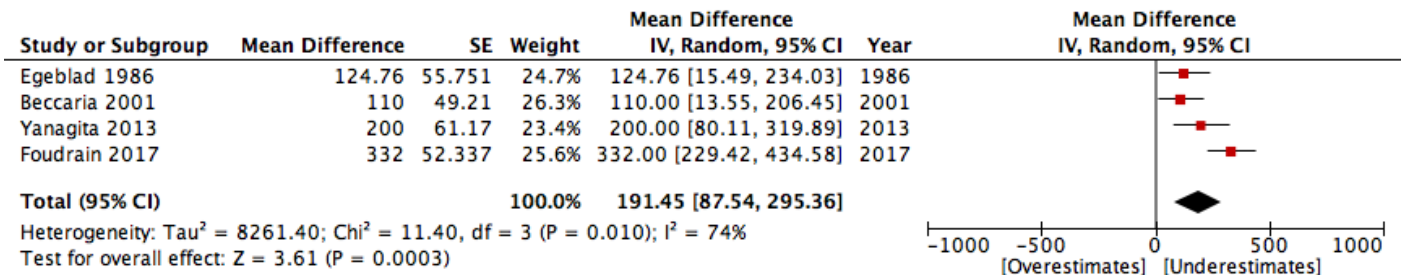

Figure B. Forest plot for subsegment counting

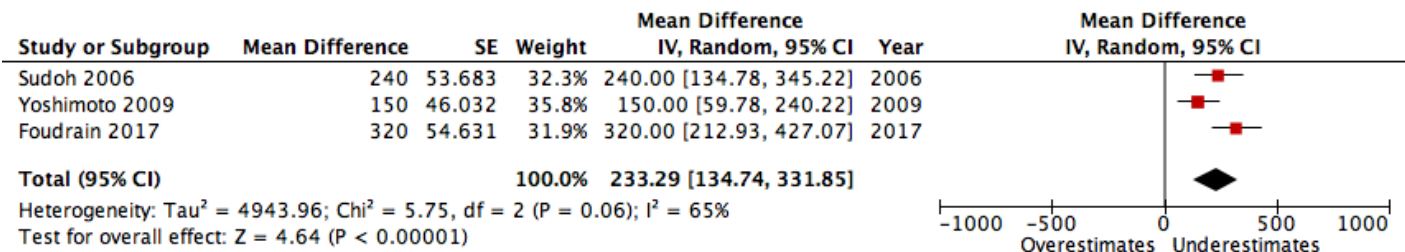

Figure C. Forest plot of perfusion scintigraphy

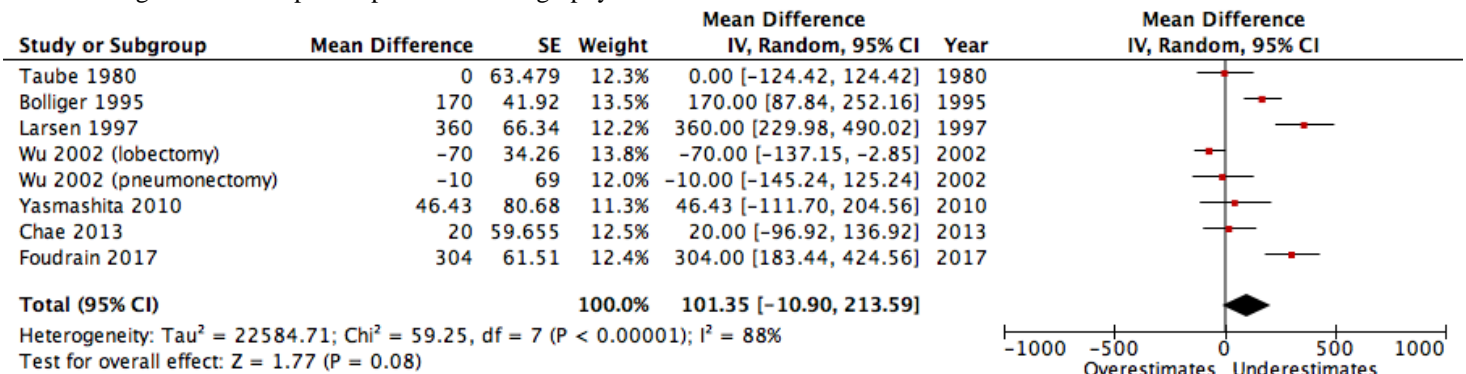

Figure D. Forest plot of CT perfusion

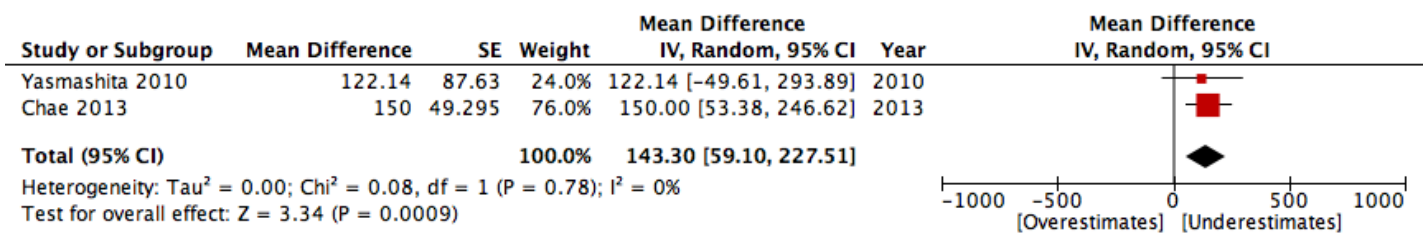

Figure E. Forest plot of CT density and volume

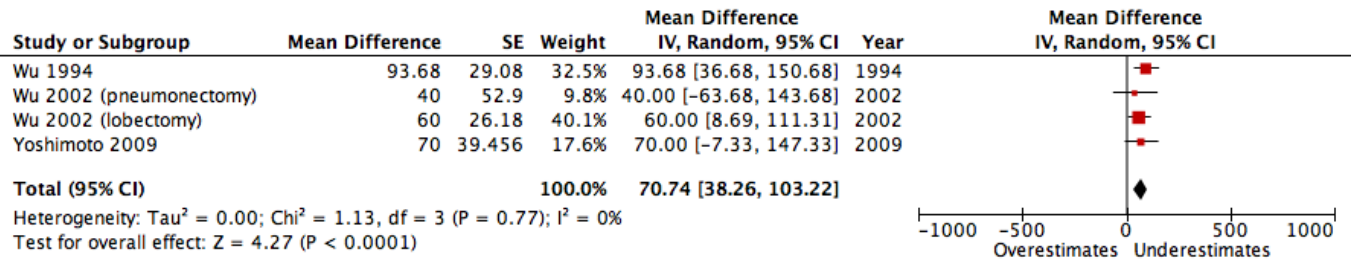

Figure F. Forest plot of SPECT-CT

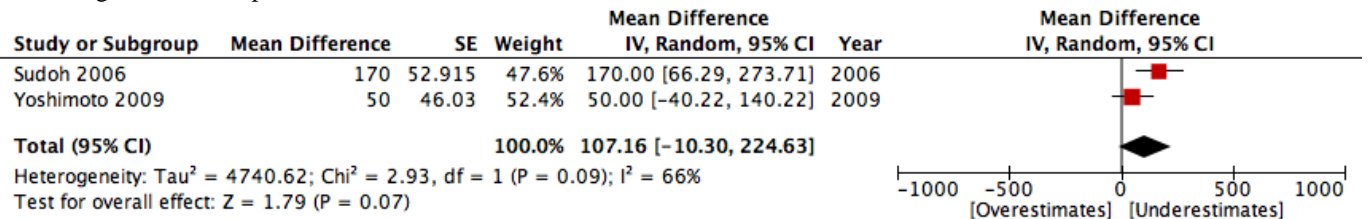

## Appendix 4. Qualitative information about studies that could not be meta-analysed

| Study                       | Outcome         | Techniques reported by smallest mean difference                                                                               | Author conclusion                                                                                                                                         |
|-----------------------------|-----------------|-------------------------------------------------------------------------------------------------------------------------------|-----------------------------------------------------------------------------------------------------------------------------------------------------------|
| Yabuuchi, 2016 <sup>1</sup> | Change in FEV1  | 1. CT volumetry & densitometry<br>2. Subsegment counting<br>3. CT volumetry                                                   | CT volumetry & densitometry more strongly correlated with postoperative FEV1 than subsegment counting or CT volumetry.                                    |
| Ohno, 2015 <sup>2</sup>     | FEV1 % expected | 1. Plain MRI<br>2. Dynamic contrast MRI<br>3. CT volumetry & densitometry<br>4. Segment counting<br>5. Perfusion scintigraphy | Plain MRI, dynamic contrast MRI and CT volumetry & densitometry equally useful. These are more accurate than segment counting and perfusion scintigraphy. |
| Ohno, 2007 <sup>3</sup>     | FEV1 % expected | 1. SPECT-CT<br>2. SPECT<br>3. Ventilation scintigraphy<br>4. Perfusion scintigraphy                                           | SPECT-CT and SPECT more accurate and reproducible than ventilation or perfusion scintigraphy                                                              |

### References

<sup>1</sup> Yabuuchi H, Kawanami S, Kamitani T, Yonezawa M, Yamasaki Y, Yamanouchi T, et al. Prediction of postoperative pulmonary function after lobectomy for primary lung cancer: A comparison among counting method, effective lobar volume, and lobar collapsibility using inspiratory/expiratory CT. *Eur J Radiol.* 2016 Nov;85(11):1956–62

<sup>2</sup> Ohno Y, Seki S, Koyama H, Yoshikawa T, Matsumoto S, Takenaka D, et al. 3D ECG- and respiratory-gated non-contrast-enhanced (CE) perfusion MRI for postoperative lung function prediction in non-small-cell lung cancer patients: A comparison with thin-section quantitative computed tomography, dynamic CE-perfusion MRI, and perfusion scan. *J Magn Reson Imaging JMRI.* 2015 Aug;42(2):340–53.

<sup>3</sup> Ohno Y, Koyama H, Takenaka D, Nogami M, Kotani Y, Nishimura Y, et al. Coregistered ventilation and perfusion SPECT using krypton-81m and Tc-99m-labeled macroaggregated albumin with multislice CT utility for prediction of postoperative lung function in non-small cell lung cancer patients. *Acad Radiol.* 2007 Jul;14(7):830–8.
